# Supplementary material for: A potent and protective human neutralizing antibody targeting a novel vulnerable site of Epstein-Barr virus
Source: PubMed Central journal article supplement (PMC8595662; doi:10.1038/s41467-021-26912-6), 2021-11-16
Supplement: 41467_2021_26912_MOESM1_ESM.pdf [file 41467_2021_26912_MOESM1_ESM.pdf]

1 **Supplementary Information for**  
2 **A potent and protective human neutralizing antibody targeting a novel**  
3 **vulnerable site of Epstein-Barr Virus**

4  
5 Qian-Ying Zhu<sup>1,6,9</sup>, Sisi Shan<sup>2,9</sup>, Jinfang Yu<sup>3,9</sup>, Si-Ying Peng<sup>4</sup>, Cong Sun<sup>1</sup>,  
6 Yanan Zuo<sup>2</sup>, Lan-Yi Zhong<sup>1</sup>, Shu-Mei Yan<sup>1</sup>, Xiao Zhang<sup>1</sup>, Ziqing Yang<sup>2</sup>,  
7 Yong-Jian Peng<sup>1</sup>, Xuanling Shi<sup>2</sup>, Su-Mei Cao<sup>5</sup>, Xinquan Wang<sup>3</sup><sup>✉</sup>, Mu-Sheng  
8 Zeng<sup>1</sup><sup>✉</sup>, Linqi Zhang<sup>2,7,8</sup><sup>✉</sup>

9  
10 <sup>1</sup>State Key Laboratory of Oncology in South China, Collaborative Innovation  
11 Center for Cancer Medicine, Guangdong Key Laboratory of Nasopharyngeal  
12 Carcinoma Diagnosis and Therapy, Sun Yat-sen University Cancer Center  
13 (SYSUCC), Guangzhou 510060, China.

14 <sup>2</sup>NexVac Research Center, Comprehensive AIDS Research Center, Center for  
15 Infectious Diseases Research, and Beijing Advanced Innovation Center for  
16 Structural Biology, School of Medicine, Tsinghua University, Beijing 100084,  
17 China.

18 <sup>3</sup>The Ministry of Education Key Laboratory of Protein Science, Beijing  
19 Advanced Innovation Center for Structural Biology, Beijing Frontier Research  
20 Center for Biological Structure, Collaborative Innovation Center for Biotherapy,  
21 School of Life Sciences, Tsinghua University, 100084 Beijing, China.

22 <sup>4</sup>Beijing IDMO Company Limited, Beijing, China.

23 <sup>5</sup>State Key Laboratory of Oncology in South China, Department of Cancer  
24 Prevention Research, Sun Yat-sen University Cancer Center (SYSUCC),  
25 Guangzhou 510060, China.

26 <sup>6</sup>Department of Laboratory Medicine, The Eighth Affiliated Hospital, Sun  
27 Yat-sen University, Shenzhen 518003, PR China.

28 <sup>7</sup>Institute of Biopharmaceutical and Health Engineering, Tsinghua Shenzhen  
29 International Graduate School, Tsinghua University, 518055 Shenzhen, China.

30 <sup>8</sup>Institute of Biomedical Health Technology and Engineering, Shenzhen Bay  
31 Laboratory, 518132 Shenzhen, China.

32 <sup>9</sup>These authors contributed equally.

33 ✉ email:

34 [xinquanwang@mail.tsinghua.edu.cn](mailto:xinquanwang@mail.tsinghua.edu.cn);

35 [zengmsh@sysucc.org.cn](mailto:zengmsh@sysucc.org.cn);

36 [zhanglinqi@mail.tsinghua.edu.cn](mailto:zhanglinqi@mail.tsinghua.edu.cn)

37

38

39

40

41

42

43

44

45  
46  
47  
48  
49  
50  
51  
52  
53

### Supplementary Figures

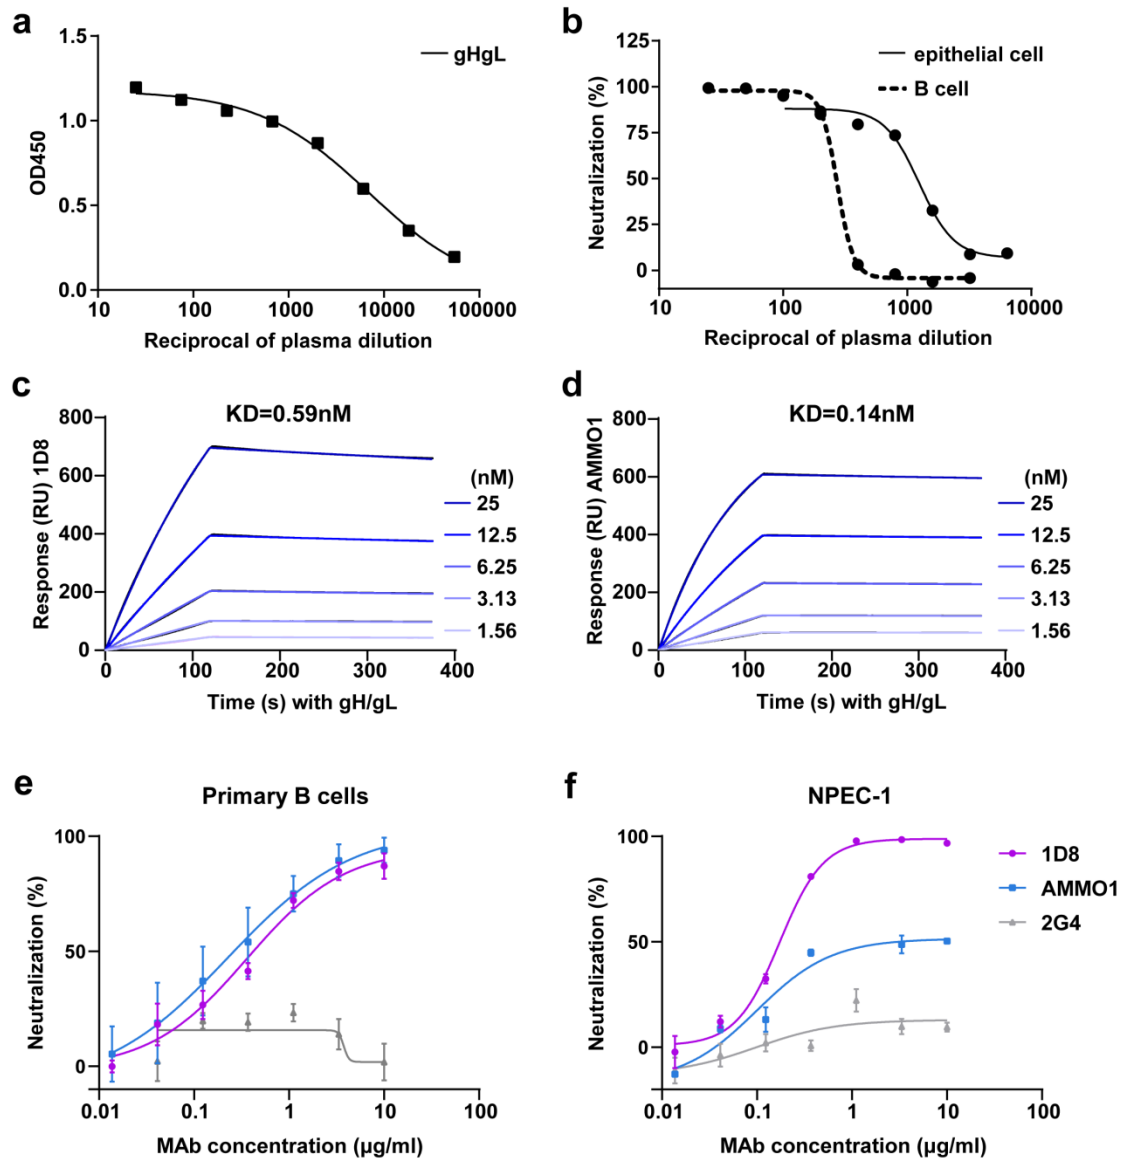

54  
55 **Supplementary Figure 1. Plasma binding and neutralizing activities from**  
56 **donor 27.** (a) Plasma binding activities to gH/gL measured by ELISA. (b)  
57 Plasma neutralizing activities against EBV infection of Raji B cells and HNE1  
58 epithelial cells. Binding activity of 1D8 (c) or AMMO1 (d) to gH/gL measured by  
59 SPR. (e) Neutralizing activities of 1D8, AMMO1 and 2G4 against EBV infection  
60 of primary B cells and (f) Bmi1-immortalized nasopharyngeal epithelial cell line  
61 (NPEC1-Bmi1). The data shown is means  $\pm$  SEM from three replicates. Source

62 data are provided as a Source Data File.

63

64

65

66

67

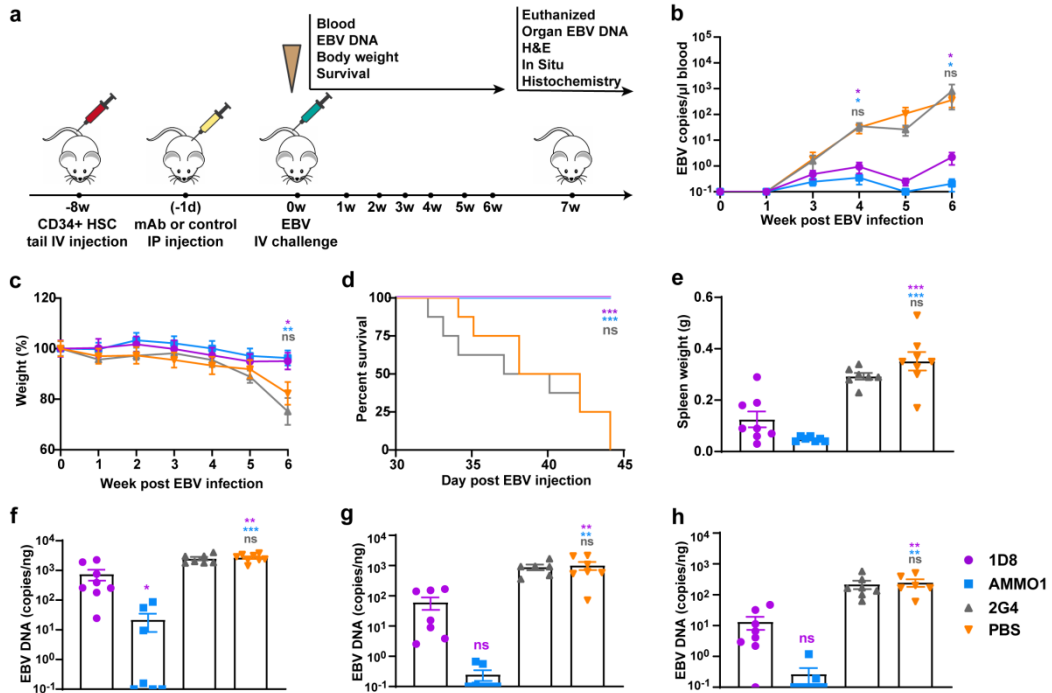

68

69 **Supplementary Figure 2. Protective effect of single dose of 1D8 on fatal**

70 **EBV attack in humanized mice** (a) Timeline for engrafting CD34+ human

71 hematopoietic stem cells (HSC), antibody administration, viral challenge, and

72 monitoring for various biological and clinical outcomes. 400  $\mu$ g of 1D8 (n=8),

73 positive control AMMO1 (n=7), negative control 2G4 (n=7), or PBS (n=8) were

74 administered to the humanized mice via intraperitoneal injection 24 h prior to

75 intravenous challenge with Akata EBV. (b) EBV DNA in the peripheral blood, (c)

76 body weight, and (d) survival were monitored weekly. On week 7 post infection,

77 (e) spleen weight (f) virus titers in spleen, (g) liver, (h) kidney were analyzed.

78 All data are presented as mean  $\pm$  SEM. \* $p$  < 0.05; \*\* $p$  < 0.01; \*\*\* $p$  < 0.001; ns,

79 no significant, two-tailed unpaired Student's  $t$ -test. (b) 1D8 vs PBS in 4w

80 \* $p$ =0.038, AMMO1 vs PBS in 4w \* $p$ =0.048, 1D8 vs PBS in 6w \* $p$ =0.011,

81 AMMO1 vs PBS in 6w \* $p$ =0.017; (c) \* $p$ =0.016, \*\* $p$ =0.009; (d) \*\*\* $p$  < 0.001,

82 log-rank test (Mantel-Cox); (e) 1D8 vs PBS \*\*\* $p$ =0.0003, AMMO1 vs PBS \*\*\* $p$

83 < 0.001; (f) \*\* $p$ =0.0018, \*\*\* $p$  < 0.001; \* $p$ =0.0417; (g) 1D8 vs PBS \*\* $p$ =0.005,

84 AMMO1 vs PBS \*\* $p$ =0.0057; (h) 1D8 vs PBS \*\* $p$ =0.0017, AMMO1 vs PBS

85 \*\* $p$ =0.0022. Source data are provided as a Source Data File.

86

87

88

89

90  
91  
92

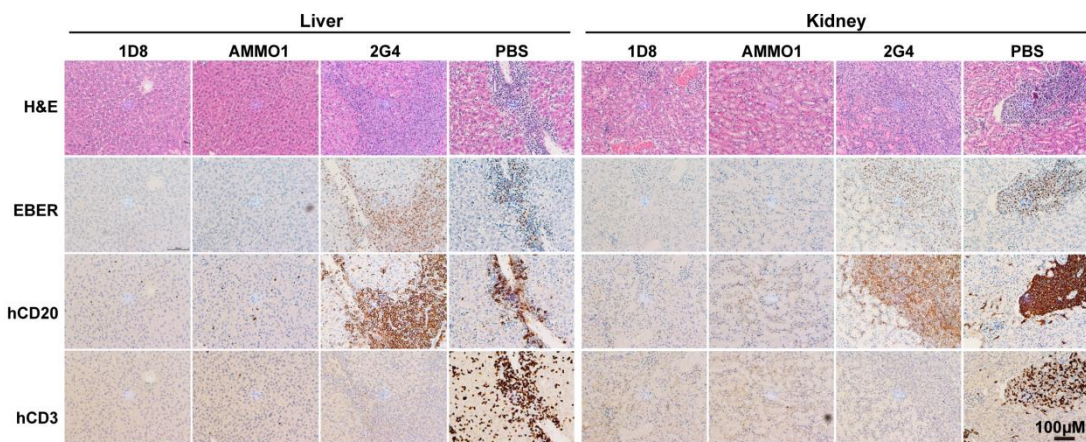

93

94 **Supplementary Figure 3. 1D8 reduces viral replication and tissue**  
95 **damages in liver and kidney of mice.**

96

97 Hepatic and renal sections stained for hematoxylin and eosin (H&E), human  
98 CD20 (hCD20), human CD3 (hCD3), and EBV encoded RNA (EBER) at  
99 necropsy. Scale bar of 100  $\mu$ m is shown. Each image is representative of a  
group of 7-8 mice.

100

101

102

103

104

105

106

107

108

109

110

111

112

113

114

115

116

117

118

119

120

121

122

123  
124  
125  
126

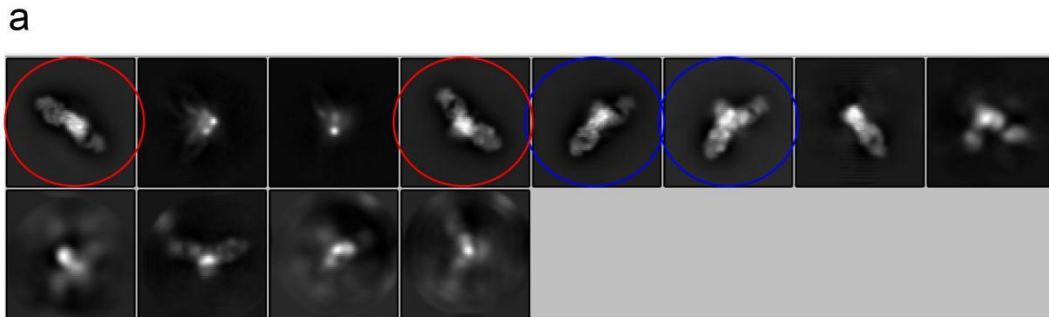

2D classification of EBV gH/gL-1D8-AMMO1 complexes

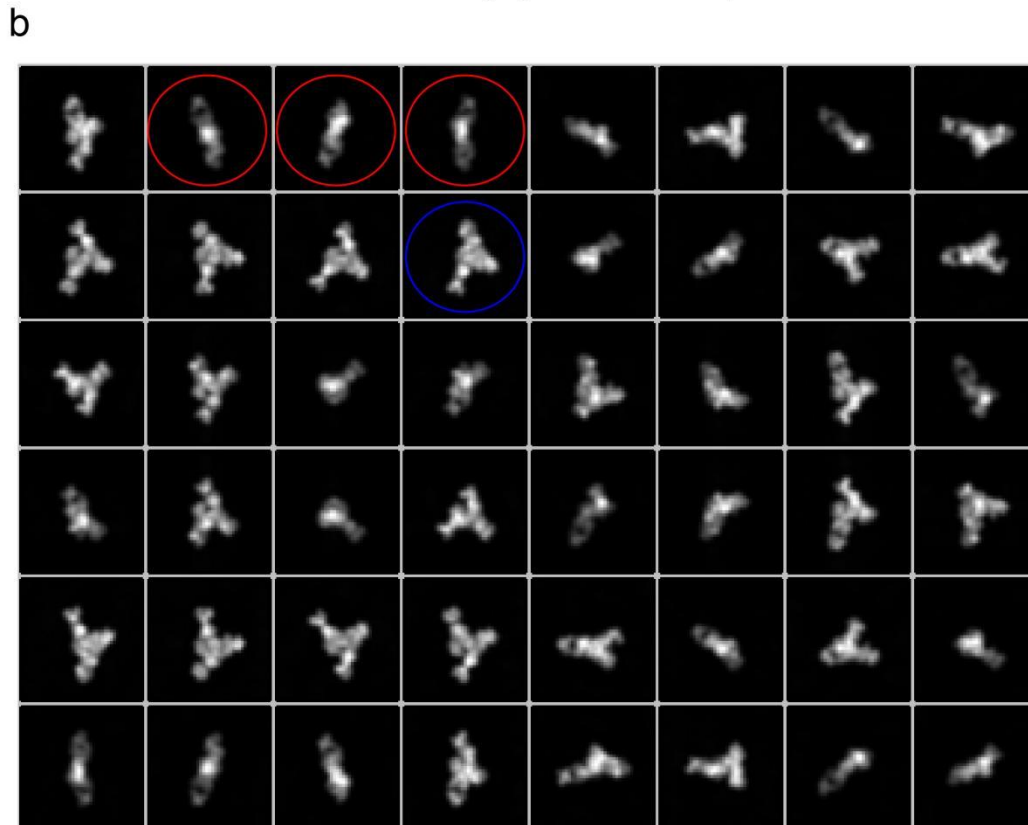

Projection of EBV gH/gL-1D8-AMMO1 model

127  
128  
129  
130  
131  
132

**Supplementary Figure 4. The 2D classification results of gH/gL-1D8-AMMO1 ternary complex and the projection of merged gH/gL-1D8-AMMO1.** (a) The 2D classification results of gH/gL-1D8-AMMO1 ternary complex. (b) The projection of merged gH/gL-1D8-AMMO1 model. Circles of the same color indicate projections of the same or similar orientation.

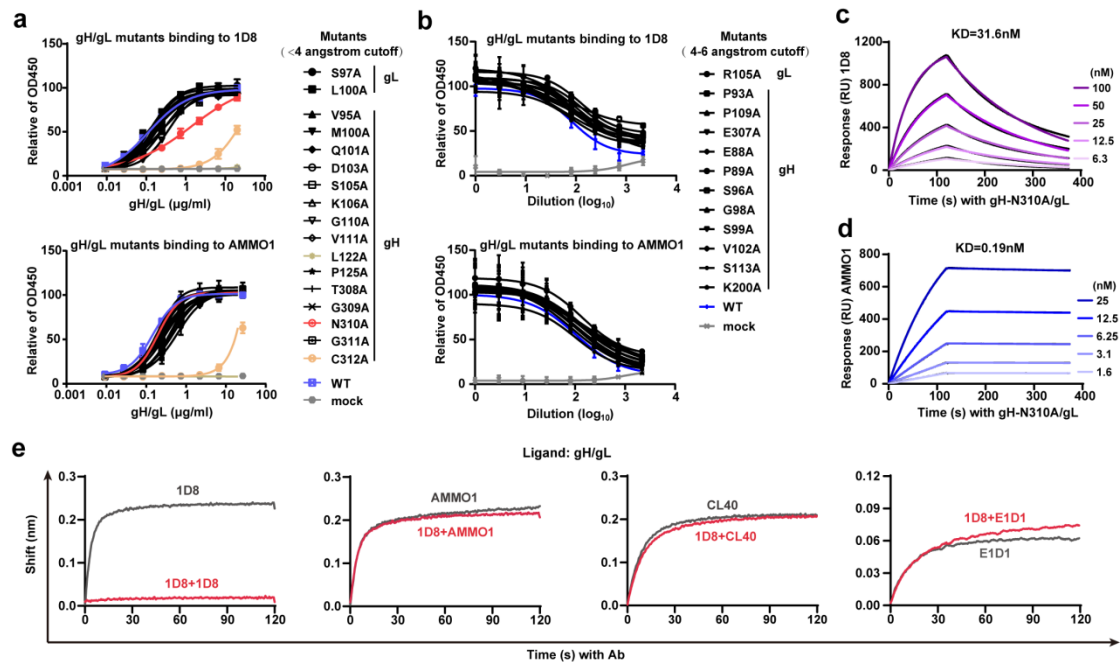

133

134

135 **Supplementary Figure 5. Binding of 1D8 to gH/gL mutants and its**

136 **competition with other gH/gL antibodies.**

137 1D8 and AMMO1 binding to various gH/gL mutants measured by ELISA,

138 determined by using a 4 angstrom (a) and 4-6 angstrom (b) distance cutoff.

139 ELISA was performed in duplicate wells, and the data shown are means with

140 SEM from two replicates. Binding activity of 1D8 (c) and AMMO1 (d) to

141 gH-N310A/gL mutant measured by SPR. (e) Competitive binding of 1D8 with

142 AMMO1, CL40 or E1D1 to gH/gL measured by BLI. Source data are provided

143 as a Source Data File.

144

145

146

147

148

149

150

151

152

153

154

155

156

157

158

159

160

161

162

163 **Supplementary Tables**

164

165 **Supplementary Table 1. Neutralization potency of monoclonal**  
166 **antibodies.**

| Mab   | IC <sub>50</sub> (µg/ml) |       |                 |            |
|-------|--------------------------|-------|-----------------|------------|
|       | HNE1                     | Raji  | Primary B cells | NPEC1-Bmi1 |
| 1D8   | 0.123                    | 0.238 | 0.361           | 0.173      |
| 2A6   | 0.745                    | 1.320 | -               | -          |
| AMMO1 | 0.127                    | 0.318 | 0.227           | ~10        |
| 2G4   | NA                       | NA    | NA              | NA         |

167

168

169

170

171

172

173

174

175

176

177

178

179

180

181

182

183

184

185

186

187

188

189

190

191

192

193

194

195

196

197

198

199  
200  
201  
202  
203  
204

**Supplementary Table 2. Kinetic Analysis of Antibodies Binding to gH/gL Measured by SPR.**

| Ligand | Anylate     | kon (1/Ms) $\times 10^5$ | koff (1/s) $\times 10^{-4}$ | KD (nM) |
|--------|-------------|--------------------------|-----------------------------|---------|
| 1D8    | gH/gL S97A  | 1.33                     | 1.36                        | 1.02    |
| 1D8    | gH/gL L100A | 1.07                     | 1.55                        | 1.44    |
| 1D8    | gH V95A/gL  | 1.30                     | 2.31                        | 1.77    |
| 1D8    | gH M100A/gL | 1.51                     | 1.96                        | 1.30    |
| 1D8    | gH Q101A/gL | 0.95                     | 1.95                        | 2.03    |
| 1D8    | gH D103A/gL | 0.72                     | 0.69                        | 0.95    |
| 1D8    | gH S105A/gL | 0.90                     | 0.97                        | 1.08    |
| 1D8    | gH K106A/gL | 1.26                     | 1.09                        | 0.86    |
| 1D8    | gH G110A/gL | 2.66                     | 0.26                        | 0.10    |
| 1D8    | gH V111A/gL | 1.11                     | 1.48                        | 1.34    |
| 1D8    | gH P125A/gL | 0.71                     | 2.00                        | 2.79    |
| 1D8    | gH T308A/gL | 1.04                     | 1.01                        | 0.97    |
| 1D8    | gH G309A/gL | 0.95                     | 0.95                        | 1.00    |
| 1D8    | gH N310A/gL | 1.75                     | 55.20                       | 31.60   |
| 1D8    | gH G311A/gL | 0.78                     | 2.05                        | 2.62    |
| 1D8    | gH/gL WT    | 2.45                     | 1.46                        | 0.59    |
| AMMO1  | gH N310A/gL | 4.97                     | 0.96                        | 0.19    |
| AMMO1  | gH/gL WT    | 5.77                     | 0.85                        | 0.14    |

205  
206  
207  
208  
209  
210  
211  
212  
213  
214  
215  
216  
217  
218



219  
220  
221  
222  
223

**Supplementary Table 3. Data collection and refinement statistics.**

---

| EBV gH/gL-1D8                                        |                                  |
|------------------------------------------------------|----------------------------------|
| Data collection                                      |                                  |
| Space group                                          | P4 <sub>1</sub> 2 <sub>1</sub> 2 |
| Cell dimensions                                      |                                  |
| <i>a</i> , <i>b</i> , <i>c</i> (Å)                   | 212.865, 212.865, 598.128        |
| $\alpha$ , $\beta$ , $\gamma$ , (°)                  | 90, 90, 90                       |
| Resolution (Å)                                       | 50.03-4.201(4.351-4.201) *       |
| <i>R</i> <sub>sym</sub> or <i>R</i> <sub>merge</sub> | 0.131 (1.261)                    |
| <i>I</i> / <i>sI</i>                                 | 8 (1.4)                          |
| Completeness (%)                                     | 99.34 (98.99)                    |
| Redundancy                                           | 8.1 (8.2)                        |
| Refinement                                           |                                  |
| Resolution (Å)                                       | 50.03-4.201                      |
| No. reflections                                      | 100335                           |
| <i>R</i> <sub>work</sub> / <i>R</i> <sub>free</sub>  | 25.30/28.33                      |
| No. atoms                                            |                                  |
| Protein                                              | 36304                            |
| <i>B</i> -factors                                    |                                  |
| Protein                                              | 153.13                           |
| R.m.s. deviations                                    |                                  |
| Bond lengths (Å)                                     | 0.004                            |
| Bond angles (°)                                      | 0.81                             |
| Ramachandran plot (%)                                |                                  |
| Favored                                              | 93.35%                           |
| Allowed                                              | 6.54%                            |
| outlier                                              | 0.11%                            |

---

224  
225  
226  
227  
228

One crystal was used.

\*Values in parentheses are for highest-resolution shell.
